# Supplementary material
Source: publisher figshare collection journal article supplement (https://sage.figshare.com/ndownloader/files/17961653)
Supplement: Supplementary file 1 [file 17961653]

***Appendix A – device users***

Table A1. Multinomial logistic regressions

|  |  | SSat (2015)  N = 6844 | | UoST (2016)  N = 5555 | |
| --- | --- | --- | --- | --- | --- |
|  |  | Device used to open the survey (*Ref: PC)* | | Device used to open the survey (*Ref: PC)* | |
|  |  | Smartphone | Tablet | Smartphone | Tablet |
| Female |  | 1.41*** | 1.48*** | 1.67*** | 1.70*** |
|  |  | (0.09) | (0.16) | (0.11) | (0.26) |
| Age | 21-22 | 0.91 | 0.79* | 0.85* | 1.16 |
| *Ref: 19-20* |  | (0.07) | (0.11) | (0.07) | (0.23) |
|  | 23-24 | 0.70*** | 0.61*** | 0.82* | 1.03 |
|  |  | (0.07) | (0.10) | (0.09) | (0.26) |
|  | 25-26 | 0.58*** | 0.65** | 0.55*** | 0.88 |
|  |  | (0.07) | (0.12) | (0.07) | (0.27) |
|  | 27+ | 0.43*** | 0.59*** | 0.48*** | 1.06 |
|  |  | (0.05) | (0.11) | (0.06) | (0.28) |
| Department | CIBio | 0.62* | 0.94 | 0.91 | 1.04 |
| *Ref: Sociology and Social research* |  | (0.15) | (0.38) | (0.21) | (0.48) |
| Cimec | 0.00 | 0.00 | 0.16* | 1.10 |
|  | (0.00) | (0.00) | (0.17) | (1.16) |
|  | Economics and Management | 1.41*** | 1.69** | 1.41*** | 1.20 |
|  |  | (0.18) | (0.37) | (0.16) | (0.29) |
|  | Physics | 1.27 | 1.34 | 1.53** | 0.95 |
|  | (0.28) | (0.52) | (0.28) | (0.42) |
|  | Civil, environmental and mechanical engineering | 1.43*** | 1.39 | 1.86*** | 0.50** |
|  | (0.20) | (0.33) | (0.22) | (0.17) |
|  | Industrial Engineering | 0.98 | 1.54 | 1.89*** | 1.48 |
|  | (0.17) | (0.44) | (0.29) | (0.50) |
|  | Information Engineering and Computer Science | 0.89 | 0.47** | 1.24 | 0.57 |
|  | (0.14) | (0.16) | (0.17) | (0.20) |
|  | Humanities | 0.93 | 1.19 | 1.07 | 1.16 |
|  |  | (0.12) | (0.26) | (0.12) | (0.26) |
|  | Mathematics | 1.48** | 1.24 | 2.09*** | 0.73 |
|  |  | (0.29) | (0.45) | (0.37) | (0.36) |
|  | Law | 1.33* | 1.59* | 1.19 | 0.73 |
|  |  | (0.19) | (0.39) | (0.16) | (0.22) |
|  | Psychology and Cog. Sci. | 1.87*** | 1.91*** | 2.32*** | 1.54* |
|  |  | (0.24) | (0.42) | (0.26) | (0.36) |
|  | School of international studies | 1.07 | 1.15 | 1.18 | 2.02 |
|  | (0.18) | (0.35) | (0.43) | (1.31) ** |
| Type of study | Master | 0.69*** | 0.76** | 0.71*** | 0.61 |
| *Ref: Bachelor* |  | (0.06) | (0.10) | (0.06) | (0.13) |
| Constant |  | 0.47*** | 0.11*** | 0.60*** | 0.07*** |
|  |  | (0.06) | (0.02) | (0.07) | (0.02) |
| *Pseudo R2* |  | *0.034* | | *0.038* | |

Coefficients are presented as Relative Risk Ratios – S.E. in brackets - * *p*<0.1; ** *p*<0.05; *** *p*<0.01

***Appendix B***

***
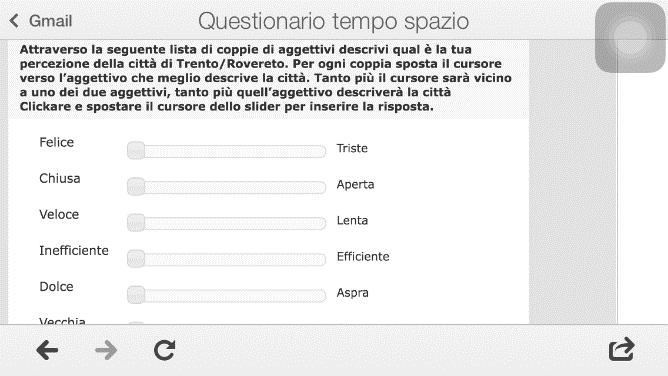
***

Figure B1. Screenshot of the UoST survey taken from iPhone 5 (4” screen)

***Appendix C – Break off rates***


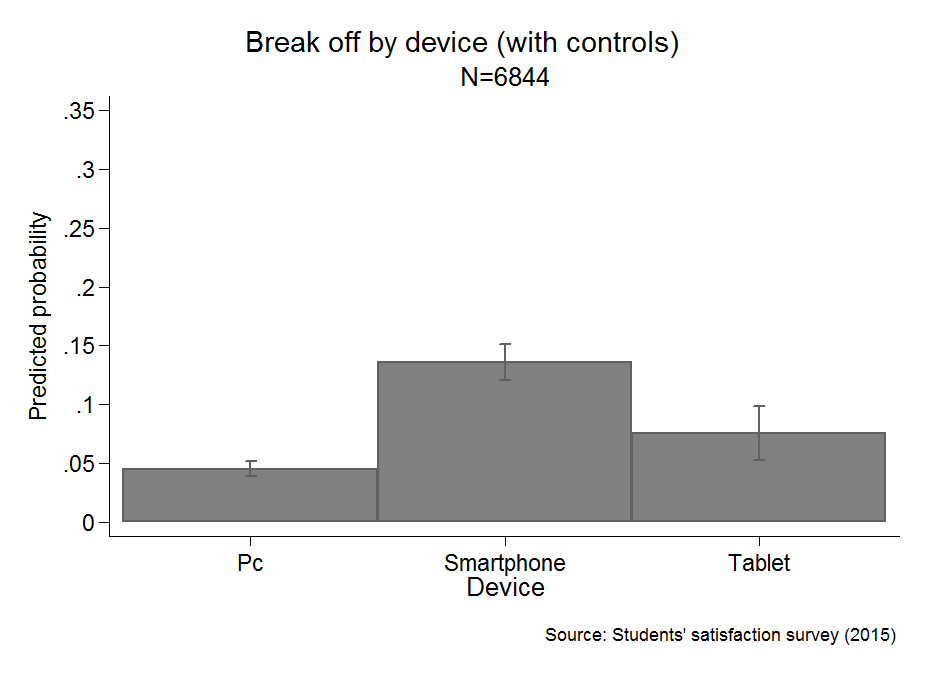


Figure C1. Predicted probabilities of breaking off by device, estimated via logistic regression (controlling for age, gender and type of study) – SSat survey


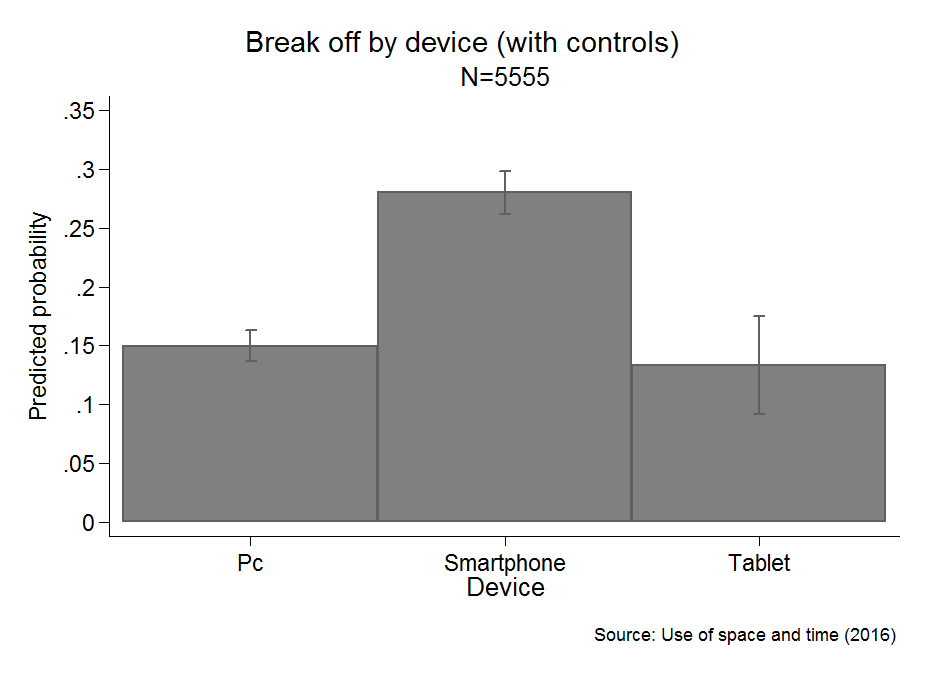


Figure C2. Predicted probabilities of breaking off by device, estimated via logistic regression (controlling for age, gender and type of study) – UoST survey

***Appendix D – Anchoring to central values***


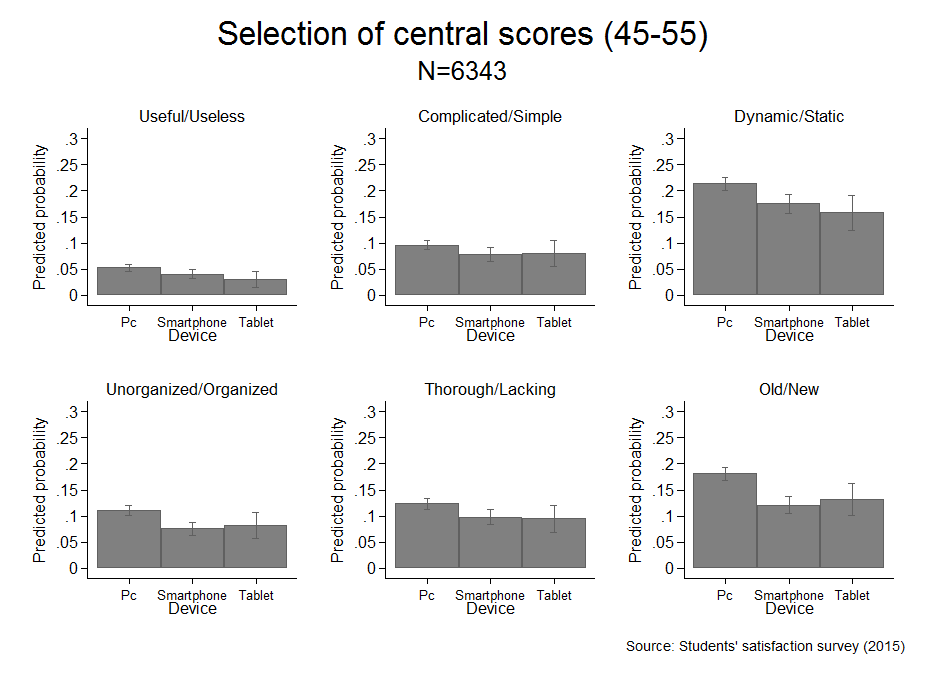


Figure D1: Predicted probabilities (estimated via binomial logistic regression) of selecting a central value by device (and controlled for gender, age and type of study) – SSat survey


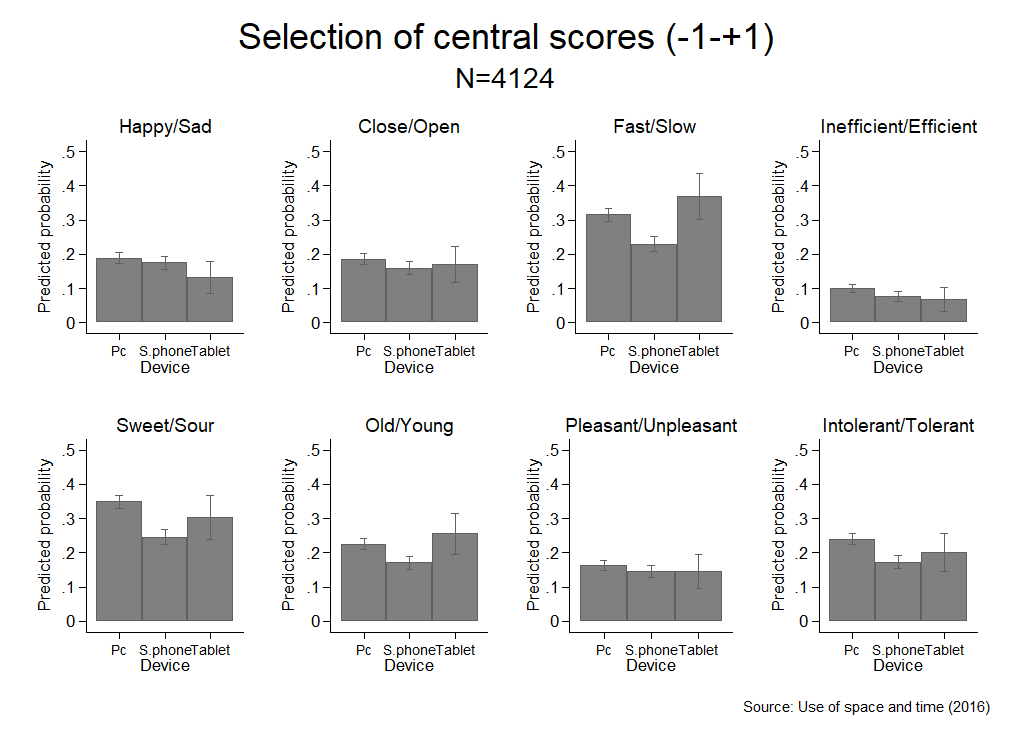


Figure D2: Predicted probabilities (estimated via binomial logistic regression) of selecting a central value by device (and controlled for gender, age and type of study) – UoST survey
